# Supplementary material for: Responses of plant diversity to precipitation change are strongest at local spatial scales and in drylands
Source: PubMed Central journal article supplement (PMC8093425; doi:10.1038/s41467-021-22766-0), 2021-05-03
Supplement: 41467_2021_22766_MOESM1_ESM.pdf [file 41467_2021_22766_MOESM1_ESM.pdf]

# Supplementary information

**Responses of plant diversity to precipitation change are strongest at local spatial scales  
and in drylands**

Lotte Korell\* et al.

\*corresponding author: [lotte.korell@ufz.de](mailto:lotte.korell@ufz.de)

## **Contents:**

**Supplementary Tables 1 to 6**

**Supplementary Figures 1 to 9**

**Supplementary References**

## Supplementary Tables

**Supplementary Table 1:** Details about experiments included in the analyses. Study indicates the ID of study, experiment indicates the ID of experimental manipulation included in the analysis whereas type of community/ manipulation describes the community type or manipulation type of the experimental manipulation where each unique combination of site, community/ manipulation type, and  $\Delta P$  is considered one experiment. Lat and long indicate the latitude and longitude of the site, respectively. Mean annual precipitation (MAP, mm a<sup>-1</sup>), mean annual temperature (MAT, ° C) and potential evapotranspiration (PET, kg a<sup>-1</sup>) indicated the climatic conditions of the experimental sites. Magnitude of precipitation manipulation relative to mean annual precipitation ( $\Delta P$ ), as well as the abundance measurement taken (cov= cover, bm = biomass, pi = point intercept), local-scale plot size (in square meters) and number of experimental units (replicates) and the duration of the experimental treatment (in years) are given. Reference include the citation to the study under the section 'Supplementary References' at the end of this document (+denotes studies where unpublished data was provided).

| #study | #exp | type of community/<br>manipulation | country        | continent | lat   | long    | MAP  | PET  | $\Delta P$ | abund | size | N | duration | Reference |
|--------|------|------------------------------------|----------------|-----------|-------|---------|------|------|------------|-------|------|---|----------|-----------|
| 1      | 1    | shrubland                          | Israel         | Asia      | 31.71 | 35.06   | 611  | 1299 | -66        | bm    | 0.04 | 5 | 1.0      | 1         |
| 2      | 2    | shrubland                          | North America  | America   | 34.33 | -106.97 | 253  | 1333 | -50        | cov   | 1.00 | 3 | 3.0      | 2         |
| 2      | 3    | shrubland                          | North America  | America   | 34.33 | -106.97 | 253  | 1333 | 42         | cov   | 1.00 | 3 | 3.0      | 2         |
| 2      | 4    | grassland                          | North America  | America   | 34.33 | -106.97 | 253  | 1333 | -50        | cov   | 1.00 | 3 | 3.0      | 2         |
| 2      | 5    | grassland                          | North America  | America   | 34.33 | -106.97 | 253  | 1333 | 42         | cov   | 1.00 | 3 | 3.0      | 2         |
| 2      | 6    | shrub-grassland                    | North America  | America   | 34.33 | -106.97 | 253  | 1333 | -50        | cov   | 1.00 | 3 | 3.0      | 2         |
| 2      | 7    | shrub-grassland                    | North America  | America   | 34.33 | -106.97 | 253  | 1333 | 42         | cov   | 1.00 | 3 | 3.0      | 2         |
| 3      | 8    | mixed grass-prairie                | North America  | America   | 41.00 | -104.00 | 361  | 1067 | 23         | bm    | 1.00 | 3 | 2.0      | 3         |
| 3      | 9    | mixed grass-prairie                | North America  | America   | 41.00 | -104.00 | 361  | 1067 | 35         | bm    | 1.00 | 3 | 2.0      | 3         |
| 3      | 10   | mixed grass-prairie                | North America  | America   | 41.00 | -104.00 | 361  | 1067 | 59         | bm    | 1.00 | 3 | 2.0      | 3         |
| 4      | 11   | grassland                          | North America  | America   | 34.33 | -106.72 | 291  | 1315 | 20         | cov   | 1.00 | 5 | 10.0     | 4         |
| 5      | 12   | harsh serpentine grassland         | North America  | America   | 38.87 | -122.43 | 872  | 1157 | 18         | cov   | 1.00 | 3 | 4.0      | 5         |
| 5      | 13   | lush serpentine grassland          | North America  | America   | 38.87 | -122.43 | 872  | 1157 | 18         | cov   | 1.00 | 3 | 4.0      | 5         |
| 5      | 14   | nonserpentine grassland            | North America  | America   | 38.87 | -122.43 | 872  | 1157 | 18         | cov   | 1.00 | 3 | 4.0      | 5         |
| 6      | 15   | grassland                          | Great Britain  | Europe    | 51.41 | -0.65   | 640  | 670  | 7          | cov   | 1.00 | 4 | 2.0      | 6         |
| 6      | 16   | grassland                          | Great Britain  | Europe    | 51.41 | -0.65   | 640  | 670  | -4         | cov   | 1.00 | 4 | 2.0      | 6         |
| 7      | 17   | semi-natural grassland             | Switzerland    | Europe    | 47.21 | 8.14    | 1522 | 759  | 33         | bm    | 0.20 | 5 | 2.0      | 7         |
| 7      | 18   | semi-natural grassland             | Switzerland    | Europe    | 47.12 | 8.14    | 1574 | 771  | 36         | bm    | 0.20 | 6 | 2.0      | 7         |
| 8      | 19   | limestone grassland                | Great Britain  | Europe    | 53.23 | -1.90   | 1001 | 591  | -11        | pi    | 2.50 | 5 | 16.0     | 8         |
| 8      | 20   | limestone grassland                | Great Britain  | Europe    | 53.23 | -1.90   | 1001 | 591  | 7          | pi    | 2.50 | 5 | 16.0     | 8         |
| 9      | 21   | grassland/ low grazed              | North America  | America   | 39.25 | -121.28 | 1034 | 1347 | -45        | cov   | 0.25 | 8 | 2.0      | 9         |
| 9      | 22   | grassland/ low grazed              | North America  | America   | 39.25 | -121.28 | 1034 | 1347 | -45        | cov   | 0.25 | 8 | 2.0      | 9         |
| 9      | 23   | grassland/high grazed              | North America  | America   | 39.25 | -121.28 | 1034 | 1347 | 23         | cov   | 0.25 | 8 | 2.0      | 9         |
| 9      | 24   | grassland/high grazed              | North America  | America   | 39.25 | -121.28 | 1034 | 1347 | 23         | cov   | 0.25 | 8 | 2.0      | 9         |
| 10     | 25   | grassland                          | North America  | America   | 33.62 | -117.76 | 285  | 1284 | 31         | bm    | 0.11 | 5 | 0.2      | 10        |
| 11     | 26   | lowland grassland                  | Czech Republic | Europe    | 48.82 | 16.00   | 495  | 783  | -50        | cov   | 0.50 | 4 | 2.0      | 11        |
| 11     | 27   | lowland grassland                  | Czech Republic | Europe    | 48.82 | 16.00   | 495  | 783  | 50         | cov   | 0.50 | 4 | 2.0      | 11        |
| 11     | 28   | mountain grassland                 | Czech Republic | Europe    | 49.50 | 18.53   | 1198 | 665  | -50        | cov   | 0.50 | 4 | 2.0      | 11        |

| #study | #exp | type of community/<br>manipulation | country        | continent | lat   | long    | MAP  | PET  | $\Delta P$ | abund | size | N  | duration | Reference |
|--------|------|------------------------------------|----------------|-----------|-------|---------|------|------|------------|-------|------|----|----------|-----------|
| 11     | 29   | mountain grassland                 | Czech Republic | Europe    | 49.50 | 18.53   | 1198 | 665  | 50         | cov   | 0.50 | 4  | 2.0      | 11        |
| 12     | 30   | semi-natural grassland             | Germany        | Europe    | 50.44 | 11.48   | 913  | 670  | -25        | cov   | 2.00 | 19 | 1.0      | 12        |
| 13     | 31   | shortgrass steppe                  | North America  | America   | 40.83 | -104.75 | 372  | 1081 | 96         | bm    | 0.25 | 10 | 14.0     | 13        |
| 14     | 32   | floodplain meadow                  | Germany        | Europe    | 52.78 | 12.18   | 537  | 697  | 14         | cov   | 0.25 | 7  | 3.0      | 14, +     |
| 14     | 33   | floodplain meadow                  | Germany        | Europe    | 53.32 | 10.95   | 629  | 665  | 14         | cov   | 0.25 | 7  | 3.0      | 14, +     |
| 15     | 34   | semi-natural grassland             | Switzerland    | Europe    | 46.85 | 6.58    | 1427 | 700  | -20        | cov   | 0.25 | 5  | 3.0      | 15        |
| 16     | 35   | coastal sand dune/ weekly          | Spain          | Europe    | 36.82 | -2.25   | 225  | 949  | -25        | bm    | 0.08 | 5  | 0.5      | 16        |
| 16     | 36   | coastal sand dune/ by-weekly       | Spain          | Europe    | 36.82 | -2.25   | 225  | 949  | -25        | bm    | 0.08 | 5  | 0.5      | 16        |
| 16     | 37   | coastal sand dune/ monthly         | Spain          | Europe    | 36.82 | -2.25   | 225  | 949  | -25        | bm    | 0.08 | 5  | 0.5      | 16        |
| 16     | 38   | coastal sand dune/ weekly          | Spain          | Europe    | 36.82 | -2.25   | 225  | 949  | -50        | bm    | 0.08 | 5  | 0.5      | 16        |
| 16     | 39   | coastal sand dune/ by-weekly       | Spain          | Europe    | 36.82 | -2.25   | 225  | 949  | -50        | bm    | 0.08 | 5  | 0.5      | 16        |
| 16     | 40   | coastal sand dune/ monthly         | Spain          | Europe    | 36.82 | -2.25   | 225  | 949  | -50        | bm    | 0.08 | 5  | 0.5      | 16        |
| 16     | 41   | abandoned field/ weekly            | Spain          | Europe    | 37.00 | -2.43   | 311  | 1047 | -25        | bm    | 0.08 | 5  | 0.5      | 16        |
| 16     | 42   | abandoned field/ biweekly          | Spain          | Europe    | 37.00 | -2.43   | 311  | 1047 | -25        | bm    | 0.08 | 5  | 0.5      | 16        |
| 16     | 43   | abandoned field/ monthly           | Spain          | Europe    | 37.00 | -2.43   | 311  | 1047 | -25        | bm    | 0.08 | 5  | 0.5      | 16        |
| 16     | 44   | abandoned field/ weekly            | Spain          | Europe    | 37.00 | -2.43   | 311  | 1047 | -50        | bm    | 0.08 | 5  | 0.5      | 16        |
| 16     | 45   | abandoned field/ biweekly          | Spain          | Europe    | 37.00 | -2.43   | 311  | 1047 | -50        | bm    | 0.08 | 5  | 0.5      | 16        |
| 16     | 46   | abandoned field/ monthly           | Spain          | Europe    | 37.08 | -2.35   | 234  | 1041 | -25        | bm    | 0.08 | 5  | 0.5      | 16        |
| 16     | 47   | annual salt grassland/weekly       | Spain          | Europe    | 37.08 | -2.35   | 234  | 1041 | -25        | bm    | 0.08 | 5  | 0.5      | 16        |
| 16     | 48   | annual salt grassland/biweekly     | Spain          | Europe    | 37.08 | -2.35   | 234  | 1041 | -25        | bm    | 0.08 | 5  | 0.5      | 16        |
| 16     | 49   | annual salt grassland/monthly      | Spain          | Europe    | 37.08 | -2.35   | 234  | 1041 | -50        | bm    | 0.08 | 5  | 0.5      | 16        |
| 16     | 50   | annual salt grassland/weekly       | Spain          | Europe    | 37.08 | -2.35   | 234  | 1041 | -50        | bm    | 0.08 | 5  | 0.5      | 16        |
| 16     | 51   | annual salt grassland/monthly      | Spain          | Europe    | 37.08 | -2.35   | 234  | 1041 | -50        | bm    | 0.08 | 5  | 0.5      | 16        |
| 17     | 52   | grassland                          | North America  | America   | 42.83 | -104.90 | 419  | 992  | 30         | bm    | 1.50 | 5  | 7.0      | 17, +     |
| 18     | 53   | grassland                          | North America  | America   | 40.12 | -105.30 | 409  | 1059 | 26         | cov   | 0.25 | 10 | 3.0      | 18        |
| 18     | 54   | grassland                          | North America  | America   | 40.12 | -105.30 | 409  | 1059 | -4         | cov   | 0.25 | 10 | 3.0      | 18        |
| 18     | 55   | grassland                          | North America  | America   | 40.12 | -105.30 | 409  | 1059 | 40         | cov   | 0.25 | 10 | 3.0      | 18        |
| 18     | 56   | grassland                          | North America  | America   | 40.12 | -105.30 | 409  | 1059 | 3          | cov   | 0.25 | 10 | 3.0      | 18        |
| 19     | 57   | old-field meadow                   | Canada         | America   | 44.63 | -76.33  | 827  | 786  | -39        | cov   | 0.50 | 10 | 4.0      | 19        |
| 19     | 58   | old-field meadow                   | Canada         | America   | 44.63 | -76.33  | 827  | 786  | 21         | cov   | 0.50 | 10 | 4.0      | 19        |
| 20     | 59   | tallgrass prairie                  | North America  | America   | 39.11 | -96.62  | 724  | 1100 | -35        | cov   | 1.00 | 5  | 3.0      | 20        |
| 21     | 60   | shortgrass/small events            | North America  | America   | 41.40 | -105.27 | 312  | 925  | 20         | bm    | 1.00 | 10 | 2.0      | 21        |
| 21     | 61   | shortgrass/ large events           | North America  | America   | 41.40 | -105.27 | 312  | 925  | 20         | bm    | 1.00 | 10 | 2.0      | 21        |
| 21     | 62   | mixed grassland/small events       | North America  | America   | 46.52 | -106.63 | 332  | 982  | 14         | bm    | 1.00 | 10 | 2.0      | 21        |
| 21     | 63   | mixed grassland/large events       | North America  | America   | 46.52 | -106.63 | 332  | 982  | 14         | bm    | 1.00 | 10 | 2.0      | 21        |
| 21     | 64   | tallgrass/ small events            | North America  | America   | 39.15 | -96.92  | 765  | 1103 | 20         | bm    | 1.00 | 10 | 2.0      | 21        |
| 21     | 65   | tallgrass/ large events            | North America  | America   | 39.15 | -96.92  | 765  | 1103 | 20         | bm    | 1.00 | 10 | 2.0      | 21        |
| 22     | 66   | steppe                             | China          | Asia      | 42.03 | 116.28  | 372  | 798  | 31         | cov   | 1.00 | 6  | 4.0      | 22        |
| 23     | 67   | steppe                             | China          | Asia      | 42.03 | 116.28  | 372  | 798  | -17        | cov   | 1.00 | 6  | 3.0      | 23        |
| 23     | 68   | steppe                             | China          | Asia      | 42.03 | 116.28  | 372  | 798  | -34        | cov   | 1.00 | 6  | 3.0      | 23        |
| 23     | 69   | steppe                             | China          | Asia      | 42.03 | 116.28  | 372  | 798  | -51        | cov   | 1.00 | 6  | 3.0      | 23        |
| 23     | 70   | steppe                             | China          | Asia      | 42.03 | 116.28  | 372  | 798  | 17         | cov   | 1.00 | 6  | 3.0      | 23        |
| 23     | 71   | steppe                             | China          | Asia      | 42.03 | 116.28  | 372  | 798  | 34         | cov   | 1.00 | 6  | 3.0      | 23        |
| 23     | 72   | steppe                             | China          | Asia      | 42.03 | 116.28  | 372  | 798  | 51         | cov   | 1.00 | 6  | 3.0      | 23        |

**Supplementary Table 2:** Summary statistics for the highest-ranked mixed effects model (delta AICc < 2) for the response variables species richness, effective number of species ( $S_{PIE}$ ) and total vegetation cover across scales (local scale, turnover scale, site scale). Degrees of freedom (df), log likelihood (logLik), delta AICc, AICc weights and conditional variance explained (cR<sup>2</sup>) and marginal variance explained (mR<sup>2</sup>) are shown. Models include following variables: linear term of the magnitude of precipitation manipulation (delta P, %), study duration (years), and mean annual precipitation (MAP, mm a-1) ‘+’ indicates an additive effect and ‘:’ interactive effects between variables.

| response         | scale           | moderators                               | df                            | logLik  | AICc    | delta  | weight | cR <sup>2</sup> | mR <sup>2</sup> |
|------------------|-----------------|------------------------------------------|-------------------------------|---------|---------|--------|--------|-----------------|-----------------|
| Species richness | local           | delta P + MAP + delta P : MAP            | 6                             | -267.12 | 546.42  | 0.00   | 0.41   | 0.162           | 0.083           |
|                  |                 | delta P + MAP + duration + delta P : MAP | 7                             | -266.09 | 546.42  | 0.01   | 0.40   | 0.158           | 0.082           |
|                  |                 | delta P                                  | 4                             | -269.92 | 547.94  | 1.52   | 0.19   | 0.144           | 0.060           |
|                  | turnover        | -                                        | 3                             | -235.34 | 476.74  | 0.00   | 0.44   | 0.071           | 0.000           |
|                  |                 | delta P                                  | 4                             | -235.15 | 478.39  | 1.65   | 0.19   | 0.074           | 0.001           |
|                  |                 | duration                                 | 4                             | -235.23 | 478.55  | 1.81   | 0.18   | 0.074           | 0.001           |
|                  | site            | delta P + MAP + delta P : MAP            | 6                             | 21.24   | -29.18  | 0.00   | 0.51   | 0.302           | 0.348           |
|                  |                 | delta P + MAP + duration + delta P : MAP | 7                             | 21.76   | -27.77  | 1.41   | 0.25   | 0.312           | 0.353           |
|                  |                 | delta P                                  | 4                             | 18.10   | -27.60  | 1.58   | 0.23   | 0.292           | 0.225           |
| $S_{PIE}$        | local           | delta P                                  | 4                             | -283.30 | 574.69  | 0.00   | 0.56   | 0.130           | 0.023           |
|                  |                 | delta P + MAP                            | 5                             | -283.18 | 576.50  | 1.81   | 0.23   | 0.134           | 0.023           |
|                  |                 | delta P + duration                       | 5                             | -283.25 | 576.63  | 1.94   | 0.21   | 0.132           | 0.022           |
|                  | turnover        | delta P + duration                       | 5                             | -295.73 | 601.60  | 0.00   | 0.30   | 0.148           | 0.026           |
|                  |                 | delta P                                  | 4                             | -296.83 | 601.75  | 0.15   | 0.28   | 0.145           | 0.025           |
|                  |                 | delta P + MAP + duration + delta P : MAP | 7                             | -294.22 | 602.69  | 1.09   | 0.17   | 0.144           | 0.039           |
|                  |                 | delta P + MAP + duration                 | 6                             | -295.48 | 603.15  | 1.55   | 0.14   | 0.144           | 0.028           |
|                  |                 | delta P + MAP                            | 5                             | -296.68 | 603.49  | 1.90   | 0.12   | 0.147           | 0.027           |
|                  | site            | duration                                 | 4                             | 63.30   | -117.80 | 0.00   | 0.25   | 0.322           | 0.000           |
|                  |                 | delta P + duration                       | 5                             | 64.20   | -117.17 | 0.62   | 0.18   | 0.368           | 0.044           |
|                  |                 | -                                        | 3                             | 61.73   | -116.98 | 0.82   | 0.17   | 0.343           | 0.019           |
|                  |                 | duration + MAP                           | 5                             | 64.10   | -116.97 | 0.83   | 0.17   | 0.337           | 0.057           |
|                  |                 | delta P + duration + MAP                 | 6                             | 65.06   | -116.37 | 1.43   | 0.12   | 0.362           | 0.083           |
|                  |                 | MAP                                      | 4                             | 62.44   | -116.08 | 1.71   | 0.11   | 0.322           | 0.039           |
|                  | Total abundance | local                                    | delta P + MAP + delta P : MAP | 6       | -447.32 | 906.84 | 0.00   | 0.68            | 0.247           |
| delta P          |                 |                                          | 4                             | -450.12 | 908.33  | 1.49   | 0.32   | 0.215           | 0.155           |
| delta P          |                 |                                          | 4                             | -27.00  | 62.64   | 0.00   | 1.00   | 0.291           | 0.282           |

**Supplementary Table 3:** Mean bootstrapped effect sizes (log response ratios = LRR) and 95% confidence intervals (upper and lower CI) for the response variables species richness, effective number of species ( $S_{PIE}$ ) and total abundance from the simplest model including the fixed effect of magnitude of precipitation manipulation (delta P), mean annual precipitation (MAP), potential evapotranspiration (PET), study duration, (duration), interaction magnitude of precipitation manipulation and mean annual precipitation (delta P : MAP), interaction magnitude of precipitation manipulation and potential evapotranspiration (delta P : PET), and the interaction of the magnitude of precipitation manipulation and direction of manipulation (decreases: direction (decr. P): delta P; increases: direction (incr. P): delta P) across scales (local scale, turnover, site scale). Bold letters indicate effect sizes and CI that do not overlap zero and are thus considered significant. Grey shaded cells indicate values where the simplest model was included among the highest-ranked mixed effects models (delta AICc < 2) (Supplementary Table 2, Table 3, Table 6).

| moderators                       | model estimates | Local scale      |             |                 | Turnover scale   |              | Site scale       |           |                 |
|----------------------------------|-----------------|------------------|-------------|-----------------|------------------|--------------|------------------|-----------|-----------------|
|                                  |                 | Species richness | $S_{PIE}$   | Total abundance | Species richness | $S_{PIE}$    | Species richness | $S_{PIE}$ | Total abundance |
| grand mean                       | effect size     | 0.02             | 0.01        | 0.04            | -0.01            | -0.02        | -0.01            | -0.01     | -0.04           |
|                                  | upper CI        | 0.07             | 0.06        | 0.13            | 0.03             | 0.03         | 0.05             | 0.02      | 0.07            |
|                                  | lower CI        | -0.03            | -0.04       | -0.04           | -0.05            | -0.08        | -0.07            | -0.04     | -0.15           |
| delta P                          | effect size     | <b>0.21</b>      | <b>0.13</b> | <b>0.55</b>     | -0.03            | <b>-0.14</b> | <b>0.19</b>      | -0.03     | <b>0.44</b>     |
|                                  | upper CI        | <b>0.29</b>      | <b>0.22</b> | <b>0.70</b>     | 0.05             | <b>-0.05</b> | <b>0.28</b>      | 0.02      | <b>0.61</b>     |
|                                  | lower CI        | <b>0.13</b>      | <b>0.04</b> | <b>0.40</b>     | -0.10            | <b>-0.23</b> | <b>0.10</b>      | -0.07     | <b>0.27</b>     |
| MAP                              | effect size     | -0.03            | -0.04       | 0.03            | -0.01            | -0.03        | 0.00             | -0.05     | 0.09            |
|                                  | upper CI        | 0.08             | 0.08        | 0.24            | 0.09             | 0.09         | 0.12             | 0.01      | 0.35            |
|                                  | lower CI        | -0.15            | -0.16       | -0.19           | -0.11            | -0.15        | -0.13            | -0.10     | -0.17           |
| PET                              | effect size     | 0.09             | 0.05        | 0.13            | -0.02            | -0.11        | -0.02            | 0.00      | -0.03           |
|                                  | upper CI        | 0.22             | 0.18        | 0.32            | 0.08             | 0.02         | 0.04             | 0.13      | 0.19            |
|                                  | lower CI        | -0.02            | -0.06       | -0.06           | -0.11            | -0.23        | -0.08            | -0.11     | -0.25           |
| duration                         | effect size     | -0.03            | 0.01        | 0.08            | 0.00             | 0.08         | 0.06             | 0.05      | 0.24            |
|                                  | upper CI        | 0.11             | 0.16        | 0.34            | 0.12             | 0.23         | 0.23             | 0.13      | 0.52            |
|                                  | lower CI        | -0.18            | -0.14       | -0.18           | -0.13            | -0.08        | -0.12            | -0.04     | -0.06           |
| delta P : MAP                    | effect size     | <b>-0.25</b>     | -0.14       | <b>-0.40</b>    | 0.03             | 0.14         | <b>-0.24</b>     | 0.04      | -0.30           |
|                                  | upper CI        | <b>-0.05</b>     | 0.08        | <b>-0.07</b>    | 0.22             | 0.37         | <b>-0.07</b>     | 0.12      | 0.10            |
|                                  | lower CI        | <b>-0.47</b>     | -0.37       | <b>-0.72</b>    | -0.17            | -0.10        | <b>-0.44</b>     | -0.06     | -0.69           |
| delta P : PET                    | effect size     | 0.02             | <b>0.27</b> | 0.24            | -0.07            | <b>-0.17</b> | 0.10             | 0.03      | 0.10            |
|                                  | upper CI        | 0.28             | <b>0.54</b> | 0.66            | 0.17             | 0.10         | 0.35             | 0.14      | 0.15            |
|                                  | lower CI        | -0.24            | <b>0.01</b> | -0.17           | -0.31            | <b>-0.44</b> | -0.14            | -0.07     | -0.21           |
| direction (decr. P):<br>delta P  | effect size     | <b>0.20</b>      | 0.10        | <b>0.54</b>     | -0.01            | -0.12        | <b>0.20</b>      | -0.03     | <b>0.49</b>     |
|                                  | upper CI        | <b>0.33</b>      | 0.24        | <b>0.78</b>     | 0.11             | 0.02         | <b>0.32</b>      | 0.03      | <b>0.69</b>     |
|                                  | lower CI        | <b>0.06</b>      | -0.04       | <b>0.32</b>     | -0.13            | -0.27        | <b>0.09</b>      | -0.09     | <b>0.27</b>     |
| direction (incr. P) :<br>delta P | effect size     | <b>0.22</b>      | <b>0.16</b> | <b>0.56</b>     | -0.04            | <b>-0.16</b> | <b>0.18</b>      | -0.02     | <b>0.37</b>     |
|                                  | upper CI        | <b>0.11</b>      | <b>0.30</b> | <b>0.75</b>     | 0.07             | <b>-0.02</b> | <b>0.32</b>      | 0.05      | <b>0.62</b>     |
|                                  | lower CI        | <b>0.35</b>      | <b>0.04</b> | <b>0.37</b>     | -0.15            | <b>-0.29</b> | <b>0.04</b>      | -0.09     | <b>0.11</b>     |

**Supplementary Table 4:** Summary statistics for the highest-ranked mixed effects model ( $\Delta AICc < 2$ ) for the response variables species richness, effective number of species (S<sub>PIE</sub>) and total vegetation across scales (local scale, turnover scale, site scale). Degrees of freedom (df), log likelihood (logLik),  $\Delta AICc$ , AICc weights and conditional variance explained (cR<sup>2</sup>) and marginal variance explained (mR<sup>2</sup>) are shown. Models include following variables: linear and quadratic term of magnitude of precipitation manipulation ( $\Delta P$ , %), study duration (years), and mean annual precipitation (MAP, mm a<sup>-1</sup>). ‘+’ indicates an additive effect and ‘:’ interactive effects between variables

| response         | scale           | moderators                                           | df                            | logLik  | AICc    | delta  | weight | cR <sup>2</sup> | mR <sup>2</sup> |
|------------------|-----------------|------------------------------------------------------|-------------------------------|---------|---------|--------|--------|-----------------|-----------------|
| Species richness | local           | delta P + MAP + delta P : MAP                        | 6                             | -267.12 | 546.42  | 0.00   | 0.29   | 0.162           | 0.083           |
|                  |                 | delta P + MAP + duration + delta P : MAP             | 7                             | -266.09 | 546.42  | 0.01   | 0.29   | 0.158           | 0.082           |
|                  |                 | delta P + delta P <sup>2</sup> + MAP + delta P : MAP | 7                             | -266.56 | 547.37  | 0.96   | 0.18   | 0.162           | 0.082           |
|                  |                 | delta P                                              | 4                             | -269.92 | 547.94  | 1.52   | 0.13   | 0.144           | 0.060           |
|                  |                 | delta P + delta P <sup>2</sup> + MAP + delta P : MAP | 8                             | -265.94 | 548.19  | 1.77   | 0.12   | 0.161           | 0.081           |
|                  | turnover        | -                                                    | 3                             | -235.34 | 476.74  | 0.00   | 0.44   | 0.071           | 0.000           |
|                  |                 | delta P                                              | 4                             | -235.15 | 478.39  | 1.65   | 0.19   | 0.074           | 0.001           |
|                  |                 | delta P <sup>2</sup>                                 | 4                             | -235.21 | 478.50  | 1.76   | 0.18   | 0.072           | 0.001           |
|                  |                 | duration                                             | 4                             | -235.23 | 478.55  | 1.81   | 0.18   | 0.074           | 0.001           |
|                  | site            | delta P + MAP + delta P : MAP                        | 6                             | 21.24   | -29.18  | 0.00   | 0.42   | 0.302           | 0.348           |
|                  |                 | delta P + MAP + duration + delta P : MAP             | 7                             | 21.76   | -27.77  | 1.41   | 0.21   | 0.312           | 0.353           |
|                  |                 | delta P                                              | 4                             | 18.10   | -27.60  | 1.58   | 0.19   | 0.292           | 0.225           |
|                  |                 | delta P + delta P <sup>2</sup> + MAP + delta P : MAP | 7                             | 21.63   | -27.51  | 1.67   | 0.18   | 0.354           | 0.310           |
| S <sub>PIE</sub> | local           | delta P                                              | 4                             | -283.30 | 574.69  | 0.00   | 0.44   | 0.130           | 0.023           |
|                  |                 | delta P + delta P <sup>2</sup>                       | 5                             | -282.97 | 576.08  | 1.39   | 0.22   | 0.132           | 0.028           |
|                  |                 | delta P + MAP                                        | 5                             | -283.18 | 576.50  | 1.81   | 0.18   | 0.134           | 0.023           |
|                  |                 | delta P + duration                                   | 5                             | -283.25 | 576.63  | 1.94   | 0.17   | 0.132           | 0.022           |
|                  | turnover        | delta P + duration                                   | 5                             | -295.73 | 601.60  | 0.00   | 0.24   | 0.148           | 0.026           |
|                  |                 | delta P                                              | 4                             | -296.83 | 601.75  | 0.15   | 0.22   | 0.145           | 0.025           |
|                  |                 | delta P + MAP + duration + delta P : MAP             | 7                             | -294.22 | 602.69  | 1.09   | 0.14   | 0.144           | 0.039           |
|                  |                 | delta P + MAP + duration                             | 6                             | -295.48 | 603.15  | 1.55   | 0.11   | 0.144           | 0.028           |
|                  |                 | delta P + delta P <sup>2</sup>                       | 5                             | -296.54 | 603.21  | 1.62   | 0.11   | 0.145           | 0.024           |
|                  |                 | delta P + MAP                                        | 5                             | -296.68 | 603.49  | 1.90   | 0.09   | 0.147           | 0.027           |
|                  |                 | delta P + delta P <sup>2</sup> + duration            | 6                             | -295.70 | 603.59  | 1.99   | 0.09   | 0.145           | 0.025           |
|                  | site            | delta P <sup>2</sup>                                 | 4                             | 71.39   | -134.18 | 0.00   | 0.39   | 0.342           | 0.069           |
|                  |                 | delta P <sup>2</sup> + MAP                           | 5                             | 72.16   | -133.42 | 0.76   | 0.27   | 0.345           | 0.096           |
|                  |                 | delta P + delta P <sup>2</sup>                       | 5                             | 71.79   | -132.66 | 1.52   | 0.18   | 0.350           | 0.077           |
|                  |                 | delta P <sup>2</sup> + duration                      | 5                             | 71.64   | -132.38 | 1.80   | 0.16   | 0.353           | 0.074           |
|                  | Total abundance | local                                                | delta P + MAP + delta P : MAP | 6       | -447.32 | 906.84 | 0.00   | 0.68            | 0.247           |
| delta P          |                 |                                                      | 4                             | -450.12 | 908.33  | 1.49   | 0.32   | 0.215           | 0.155           |
| delta P          |                 |                                                      | 4                             | -27.00  | 62.64   | 0.00   | 1.00   | 0.291           | 0.282           |

**Supplementary Table 5:** Summary statistics for the highest-ranked mixed effects model ( $\Delta AICc < 2$ ) for the response variables species richness, effective number of species ( $S_{PIE}$ ) and total vegetation cover across scales (local scale, turnover scale, site scale). Degrees of freedom (df), log likelihood (logLik), delta AICc, AICc weights and conditional variance explained ( $cR^2$ ) and marginal variance explained ( $mR^2$ ) are shown. Models include following variables: linear term of the magnitude of precipitation manipulation (delta P), direction of the manipulation (direction), study duration (years), and mean annual precipitation (MAP, mm a<sup>-1</sup>). ‘+’ indicates an additive effect and ‘:’ interactive effects between variables.

| response                      | scale    | moderators                                                     | df                                                             | logLik  | AICc    | delta   | weight | $cR^2$ | $mR^2$ |        |
|-------------------------------|----------|----------------------------------------------------------------|----------------------------------------------------------------|---------|---------|---------|--------|--------|--------|--------|
| Species richness              | local    | delta P + MAP + delta P : MAP                                  | 6                                                              | -267.12 | 546.42  | 0.00    | 0.28   | 0.162  | 0.083  |        |
|                               |          | delta P + MAP + duration + delta P : MAP                       | 7                                                              | -266.09 | 546.42  | 0.01    | 0.28   | 0.158  | 0.082  |        |
|                               |          | delta P + MAP + duration + delta P : direction                 | 7                                                              | -266.54 | 547.33  | 0.91    | 0.18   | 0.150  | 0.057  |        |
|                               |          | delta P                                                        | 4                                                              | -269.92 | 547.94  | 1.52    | 0.13   | 0.144  | 0.060  |        |
|                               |          |                                                                | delta P + MAP + duration + delta P : MAP + delta P : direction | 8       | -265.82 | 547.96  | 1.55   | 0.13   | 0.161  | 0.082  |
|                               | turnover | -                                                              |                                                                | 3       | -235.34 | 476.74  | 0.00   | 0.44   | 0.071  | 0.000  |
|                               |          | delta P                                                        |                                                                | 4       | -235.15 | 478.39  | 1.65   | 0.19   | 0.074  | 0.001  |
|                               |          | duration                                                       |                                                                | 4       | -235.23 | 478.55  | 1.81   | 0.18   | 0.074  | 0.001  |
|                               | site     | delta P + MAP + delta P : MAP                                  |                                                                | 6       | 21.24   | -29.18  | 0.00   | 0.42   | 0.302  | 0.348  |
|                               |          | delta P + MAP + duration + delta P : MAP                       |                                                                | 7       | 21.76   | -27.77  | 1.41   | 0.21   | 0.312  | 0.353  |
|                               |          | delta P                                                        |                                                                | 4       | 18.10   | -27.60  | 1.58   | 0.19   | 0.292  | 0.225  |
|                               |          | delta P + MAP + duration + delta P : MAP + delta P : direction |                                                                | 7       | 21.56   | -27.37  | 1.81   | 0.17   | 0.309  | 0.353  |
| $S_{PIE}$                     | local    | delta P                                                        | 4                                                              | -283.30 | 574.69  | 0.00    | 0.43   | 0.130  | 0.023  |        |
|                               |          | delta P + delta P : direction                                  | 5                                                              | -282.91 | 575.95  | 1.27    | 0.23   | 0.132  | 0.026  |        |
|                               |          | delta P + MAP                                                  | 5                                                              | -283.18 | 576.50  | 1.81    | 0.17   | 0.134  | 0.023  |        |
|                               |          | delta P + duration                                             | 5                                                              | -283.25 | 576.63  | 1.94    | 0.16   | 0.132  | 0.022  |        |
|                               | turnover | delta P + duration                                             |                                                                | 5       | -295.73 | 601.60  | 0.00   | 0.27   | 0.148  | 0.026  |
|                               |          | delta P                                                        |                                                                | 4       | -296.83 | 601.75  | 0.15   | 0.25   | 0.145  | 0.025  |
|                               |          | delta P + MAP + duration + delta P : MAP                       |                                                                | 7       | -294.22 | 602.69  | 1.09   | 0.16   | 0.144  | 0.039  |
|                               |          | delta P + MAP + duration                                       |                                                                | 6       | -295.48 | 603.15  | 1.55   | 0.12   | 0.144  | 0.028  |
|                               |          | delta P + MAP                                                  |                                                                | 5       | -296.68 | 603.49  | 1.90   | 0.10   | 0.147  | 0.027  |
|                               |          | delta P + duration + delta P : direction                       |                                                                | 6       | -295.70 | 603.58  | 1.98   | 0.10   | 0.144  | 0.0255 |
|                               | site     | -                                                              |                                                                | 3       | 68.68   | -131.00 | 0.00   | 0.17   | 0.322  | 0.000  |
|                               |          | MAP                                                            |                                                                | 4       | 69.79   | -130.99 | 0.02   | 0.17   | 0.322  | 0.039  |
|                               |          | delta P                                                        |                                                                | 4       | 69.39   | -130.19 | 0.81   | 0.11   | 0.343  | 0.019  |
|                               |          | duration + MAP                                                 |                                                                | 5       | 70.54   | -130.17 | 0.83   | 0.11   | 0.337  | 0.057  |
|                               |          | delta P + duration + MAP                                       |                                                                | 6       | 71.65   | -130.00 | 1.00   | 0.10   | 0.362  | 0.083  |
|                               |          | delta P + MAP                                                  |                                                                | 5       | 70.40   | -129.89 | 1.12   | 0.10   | 0.345  | 0.057  |
|                               |          | delta P + duration                                             |                                                                | 5       | 70.34   | -129.78 | 1.23   | 0.09   | 0.368  | 0.044  |
|                               |          | duration                                                       |                                                                | 4       | 69.18   | -129.76 | 1.24   | 0.09   | 0.345  | 0.018  |
| delta P + delta P : direction |          |                                                                | 5                                                              | 70.02   | -129.13 | 1.88    | 0.07   | 0.341  | 0.036  |        |
|                               |          |                                                                |                                                                |         |         |         |        |        |        |        |
| Total abundance               | local    | delta P + MAP + delta P : MAP                                  | 6                                                              | -447.32 | 906.84  | 0.00    | 0.68   | 0.247  | 0.183  |        |
|                               |          | delta P                                                        | 4                                                              | -450.12 | 908.33  | 1.49    | 0.32   | 0.215  | 0.155  |        |
|                               |          | delta P                                                        | 4                                                              | -27.00  | 62.64   | 0.00    | 1.00   | 0.291  | 0.282  |        |

**Supplementary Table 6:** Summary statistics for the highest-ranked mixed effects model ( $\Delta AICc < 2$ ) for the response variables species richness, effective number of species ( $S_{PIE}$ ) and total vegetation cover across scales (local scale, turnover scale, site scale). Degrees of freedom (df), log likelihood (logLik),  $\Delta AICc$ ,  $AICc$  weights and conditional variance explained ( $cR^2$ ) and marginal variance explained ( $mR^2$ ) are shown. Models include following variables: linear term of the magnitude of precipitation manipulation (delta P, %), study duration (years), and potential evapotranspiration (PET, kg a<sup>-1</sup>) ‘+’ indicates an additive effect and ‘:’ interactive effects between variables.

| response         | scale     | moderators                               | df                                       | logLik  | AICc    | delta  | weight | cR <sup>2</sup> | mR <sup>2</sup> |       |
|------------------|-----------|------------------------------------------|------------------------------------------|---------|---------|--------|--------|-----------------|-----------------|-------|
| Species richness | local     | delta P                                  | 4                                        | -269.92 | 547.94  | 0.00   | 0.36   | 0.144           | 0.060           |       |
|                  |           | delta P + PET                            | 5                                        | -269.08 | 548.30  | 0.37   | 0.30   | 0.146           | 0.062           |       |
|                  |           | delta P + duration                       | 5                                        | -269.48 | 549.10  | 1.16   | 0.20   | 0.145           | 0.058           |       |
|                  |           | delta P + duration + PET                 | 6                                        | -268.79 | 549.77  | 1.83   | 0.14   | 0.146           | 0.060           |       |
|                  | turnover  | -                                        | 3                                        | -235.34 | 476.74  | 0.00   | 0.45   | 0.071           | 0.000           |       |
|                  |           | delta P                                  | 4                                        | -235.15 | 478.39  | 1.65   | 0.20   | 0.087           | 0.002           |       |
|                  |           | duration                                 | 4                                        | -235.23 | 478.55  | 1.81   | 0.18   | 0.074           | 0.001           |       |
|                  |           | PET                                      | 4                                        | -235.32 | 478.73  | 1.99   | 0.17   | 0.074           | 0.000           |       |
|                  | site      | delta P                                  | 4                                        | 18.10   | -27.60  | 0.00   | 0.72   | 0.216           | 0.115           |       |
|                  |           | delta P + PET                            | 5                                        | 18.33   | -25.76  | 1.84   | 0.28   | 0.294           | 0.219           |       |
|                  | $S_{PIE}$ | local                                    | delta P + PET + delta P : PET            | 6       | -280.21 | 572.60 | 0.00   | 0.73            | 0.142           | 0.039 |
|                  |           |                                          | delta P + PET + duration + delta P : PET | 7       | -280.15 | 574.55 | 1.95   | 0.27            | 0.143           | 0.037 |
| turnover         |           | delta P + PET                            | 5                                        | -295.25 | 600.62  | 0.00   | 0.21   | 0.148           | 0.029           |       |
|                  |           | delta P + PET + delta P : PET            | 6                                        | -294.27 | 600.72  | 0.09   | 0.20   | 0.150           | 0.034           |       |
|                  |           | delta P + PET + duration + delta P : PET | 7                                        | -293.36 | 600.96  | 0.34   | 0.18   | 0.150           | 0.034           |       |
|                  |           | delta P + PET + duration                 | 6                                        | -294.46 | 601.11  | 0.49   | 0.16   | 0.145           | 0.029           |       |
|                  |           | delta P + duration                       | 5                                        | -295.73 | 601.60  | 0.97   | 0.13   | 0.143           | 0.025           |       |
|                  |           | delta P                                  | 4                                        | -296.83 | 601.75  | 1.12   | 0.12   | 0.145           | 0.025           |       |
| site             |           | -                                        | 3                                        | 64.04   | -121.72 | 0.00   | 0.34   | 0.322           | 0.000           |       |
|                  |           | duration                                 | 4                                        | 64.63   | -120.66 | 1.07   | 0.20   | 0.343           | 0.019           |       |
|                  |           | delta P                                  | 4                                        | 64.49   | -120.37 | 1.35   | 0.18   | 0.343           | 0.019           |       |
|                  |           | delta P + duration                       | 5                                        | 65.41   | -119.92 | 1.80   | 0.14   | 0.368           | 0.044           |       |
|                  |           | PET                                      | 4                                        | 64.25   | -119.90 | 1.82   | 0.14   | 0.328           | 0.001           |       |
| Total abundance  |           | local                                    | delta P                                  | 4       | -450.12 | 908.33 | 0.00   | 0.55            | 0.215           | 0.155 |
|                  |           |                                          | delta P + duration                       | 5       | -449.97 | 910.07 | 1.74   | 0.23            | 0.217           | 0.158 |
|                  |           |                                          | delta P + PET                            | 5       | -449.97 | 910.08 | 1.75   | 0.23            | 0.215           | 0.155 |
|                  | site      | delta P                                  | 4                                        | -27.00  | 62.64   | 0.00   | 0.73   | 0.291           | 0.282           |       |
|                  |           | delta P + PET                            | 5                                        | -26.82  | 64.61   | 1.97   | 0.27   | 0.293           | 0.283           |       |



## Supplementary Figures

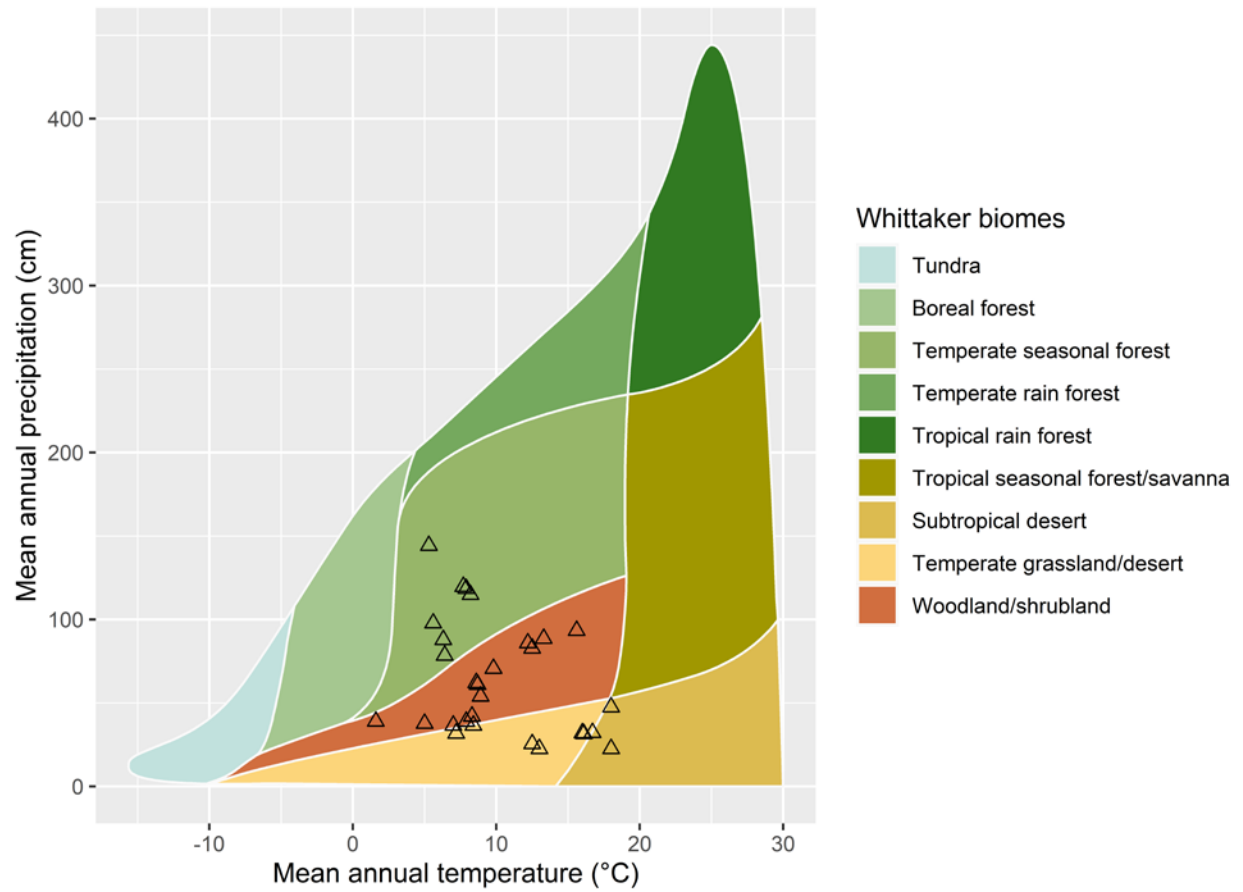

**Supplementary Figure 1:** Whittaker's biome plot, defined by mean annual temperature (cm) and mean annual precipitation (°C). Triangles represent precipitation manipulation experiments.

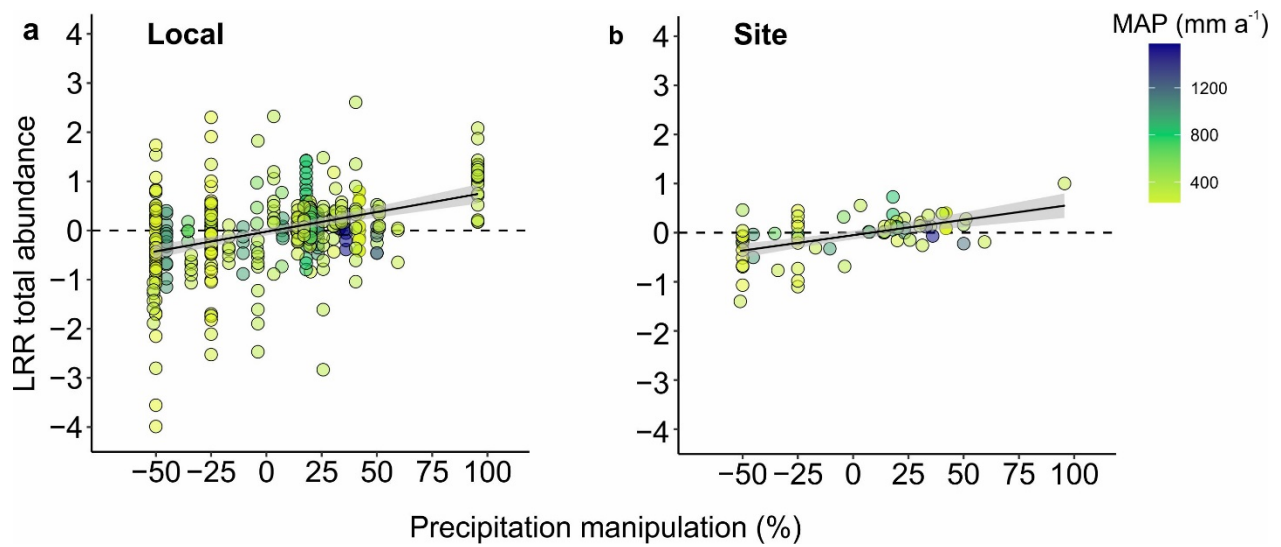

**Supplementary Figure 2:** Effect of the magnitude of precipitation manipulation on the log response ratio (LRR) of the total vegetation cover at the local scale (**a**) and site scale (**b**). Data points represent log response ratios of original data ( $n = 432$  at the local scale and  $n = 69$  at the site scale) and colors indicate the background climatic conditions; mean annual precipitation (MAP). The linear regressions (mean and 95% confidence intervals) are based on predicted values of the simplest linear mixed effect model including magnitude of precipitation manipulation (Supplementary Table 2).

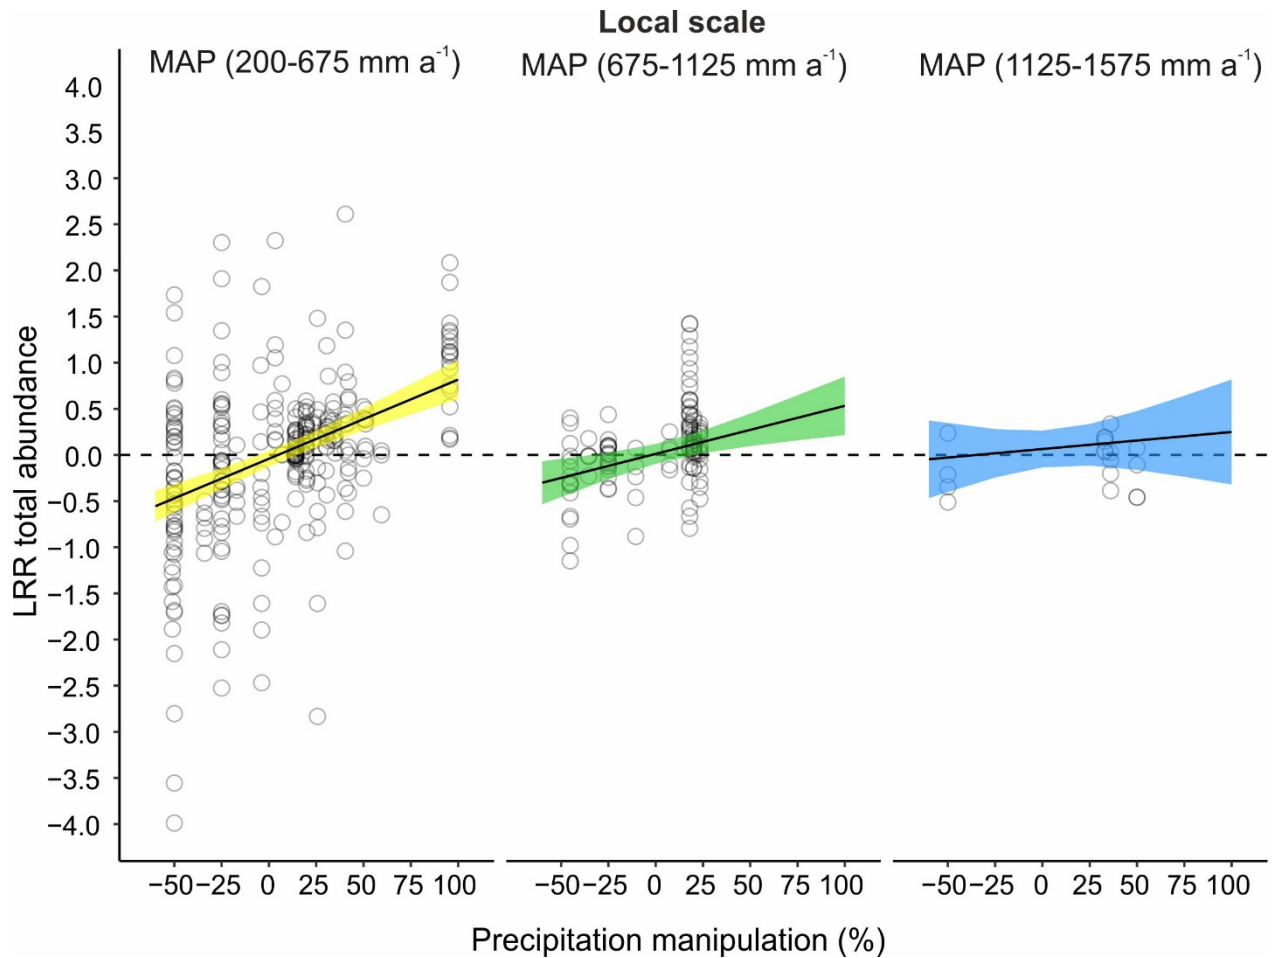

**Supplementary Figure 3:** Predictor effect plot of the sensitivity of the log response ratio of total abundance at the local scale to manipulations in the magnitude of precipitation manipulation (%) depending on the range of background mean annual precipitation (MAP). Parameter estimates (mean and 95% confidence intervals) to create this figure are obtained from the simplest model including the interaction between magnitude of precipitation manipulation and MAP (Supplementary Tables 2-3). Different colors represent different ranges in background MAP: yellow, 200-675 mm a<sup>-1</sup> (n = 295); green, 675-1125 mm a<sup>-1</sup> (n = 119); blue, 1125-1575 mm a<sup>-1</sup> (n = 18). Data points represent the log response ratios of original data.

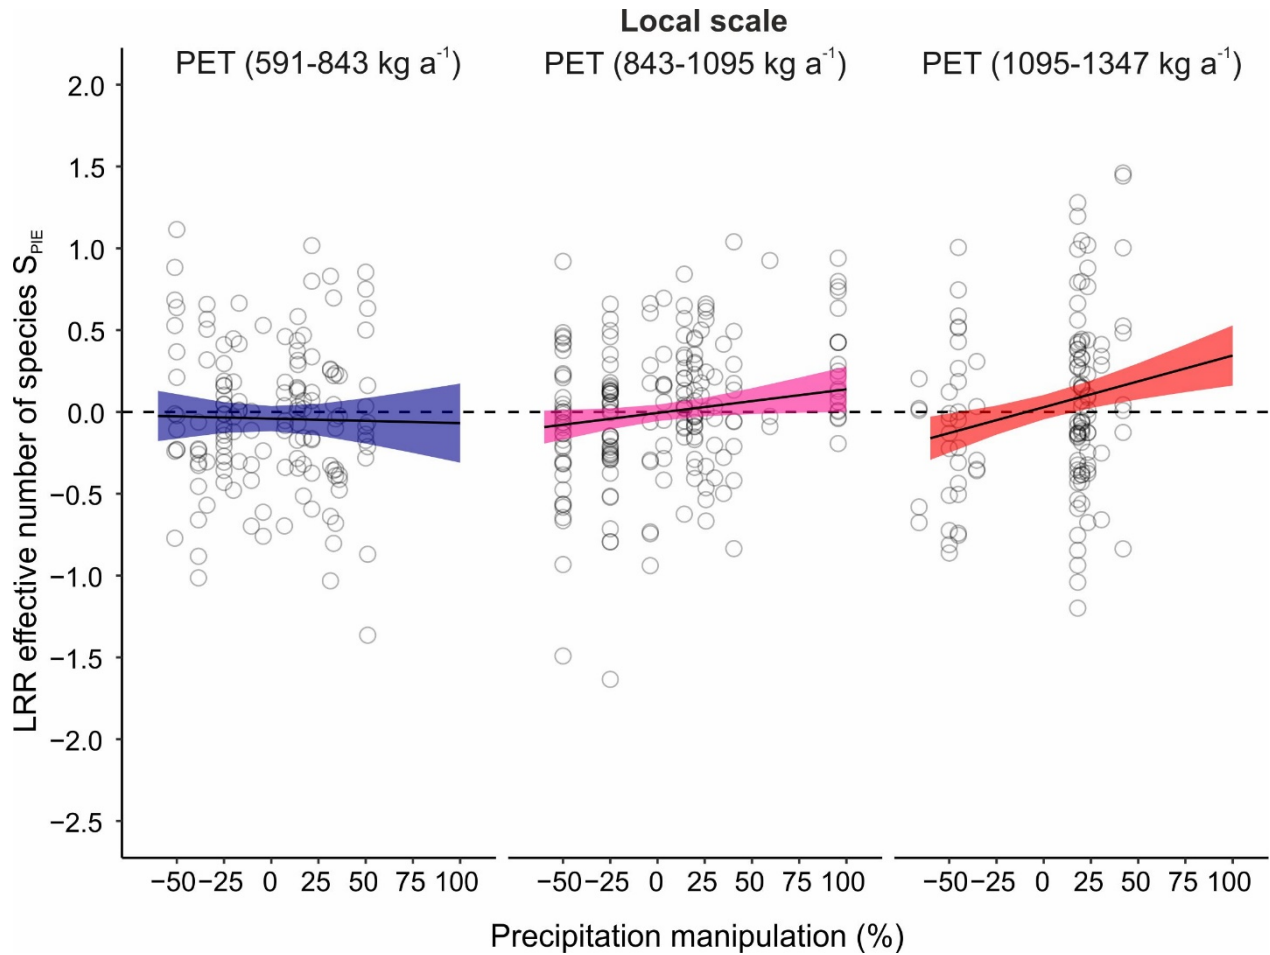

**Supplementary Figure 4:** Predictor effect plot of the sensitivity of the effect size (log response ratio) of the effective number of species  $S_{PIE}$  to manipulations in the magnitude of precipitation manipulation (%) depending on the range of background potential evapotranspiration (PET). Parameter estimates (mean and 95% confidence intervals) to create this figure are obtained from the simplest model including the interaction between magnitude of precipitation manipulation and PET (Supplementary Table 4). Different colors represent different ranges in background PET: blue, 591-843 kg a<sup>-1</sup> (n = 144); pink, 843-1095 kg a<sup>-1</sup> (n = 195); red, 1095-1347 kg a<sup>-1</sup> (n = 123). Data points represent the log response ratios of original data.

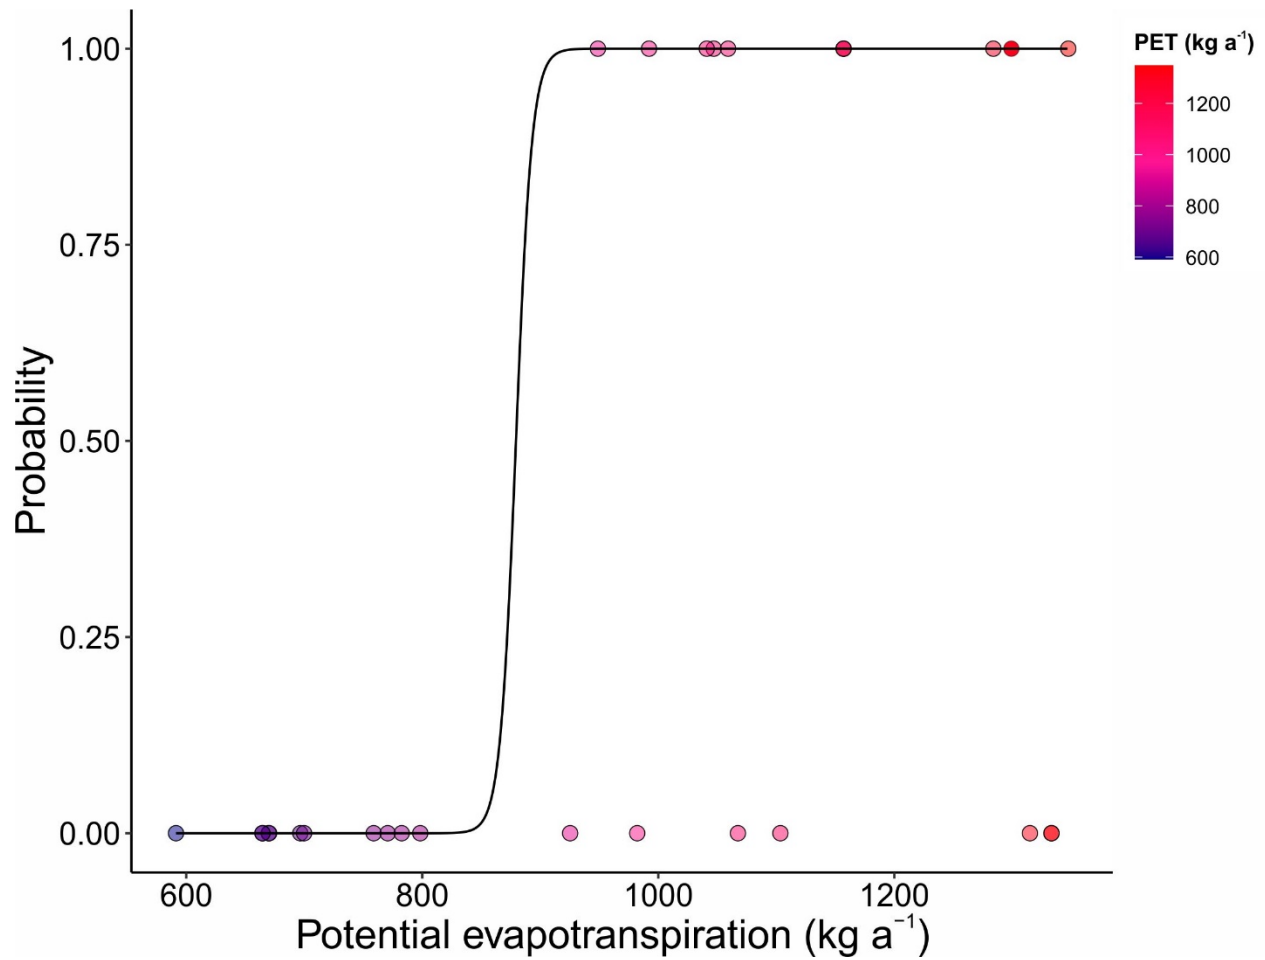

**Supplementary Figure 5:** Results of a mixed effects logistic regression showing the probability of the most dominant species within experimental site of being monocarpic in relation to the site-level potential evapotranspiration (PET). Data points represent site-specific values on the most dominant species to monocarpic (annual or biennial = 1), or polycarpic (perennial = 0).

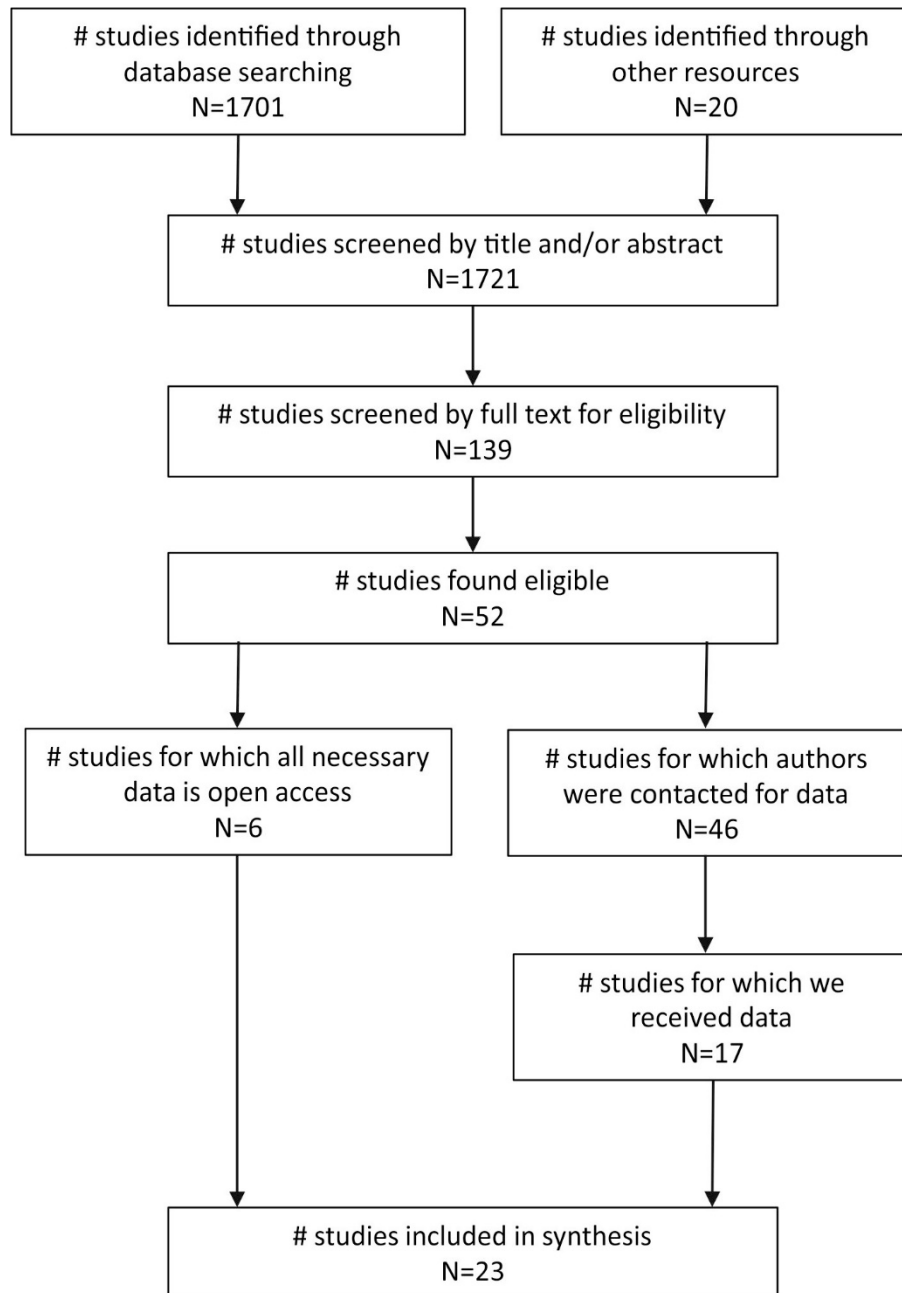

**Supplementary Figure 6:** Prisma diagram showing the different phases of the systematic literature review.

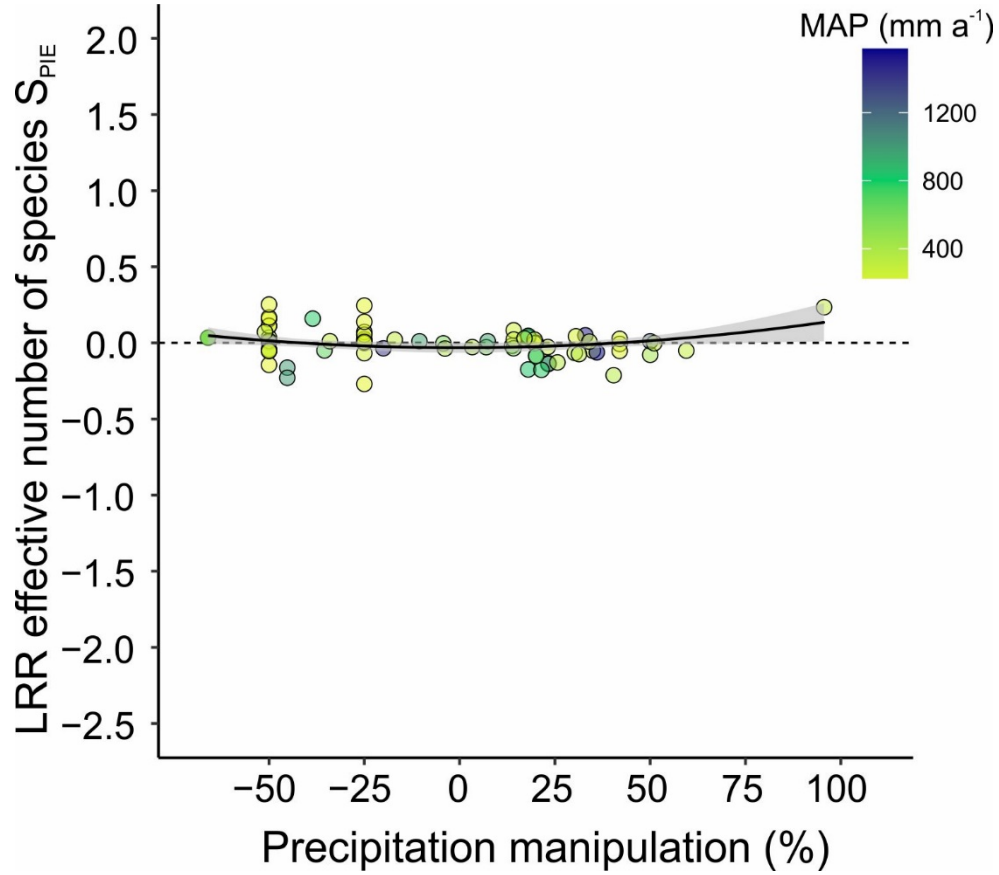

**Supplementary Figure 7:** Effect of the magnitude of precipitation manipulation on the log response ratio of the effective number of species  $S_{PIE}$  at the site scale. Data points represent log response ratios of original data and colors indicate the background mean annual precipitation (MAP). The non-linear regression (mean and 95% confidence intervals) is based on predicted values of the simplest mixed effect model including the nonlinear term of the magnitude of precipitation manipulation (Supplementary Table 4).

## Local scale

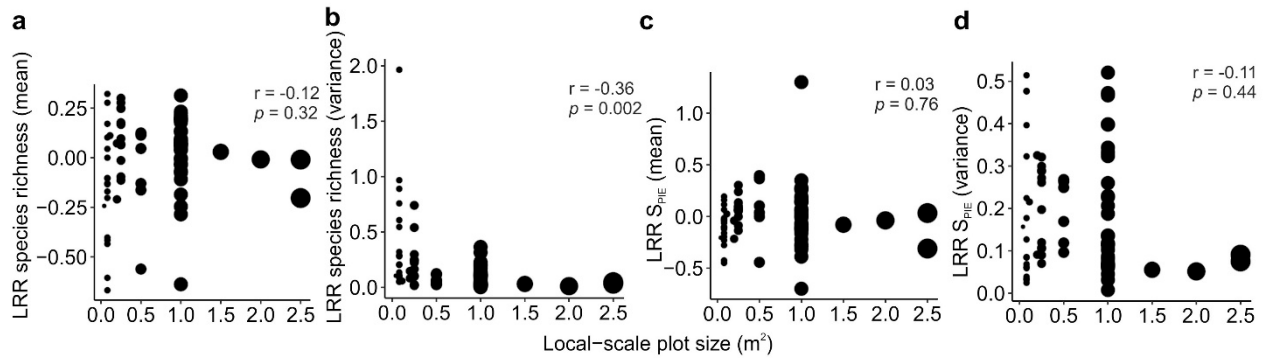

## Turnover scale

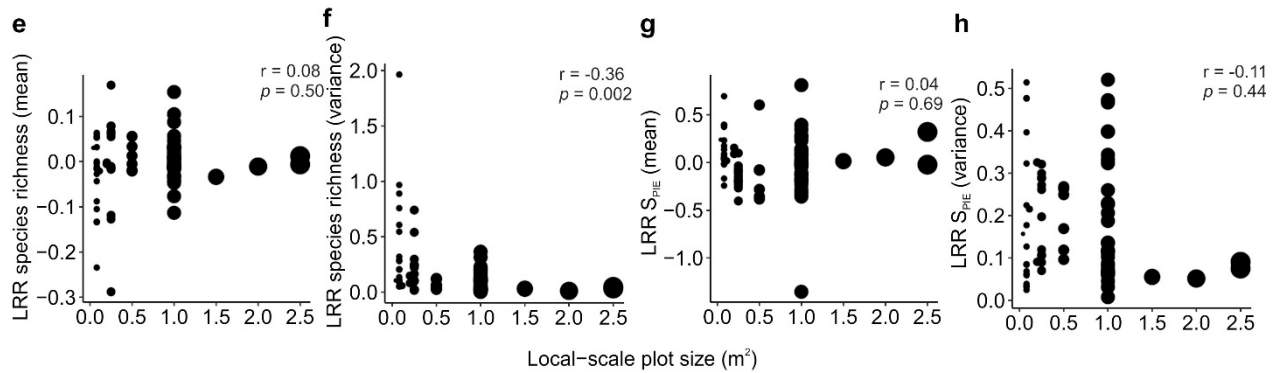

## Site scale

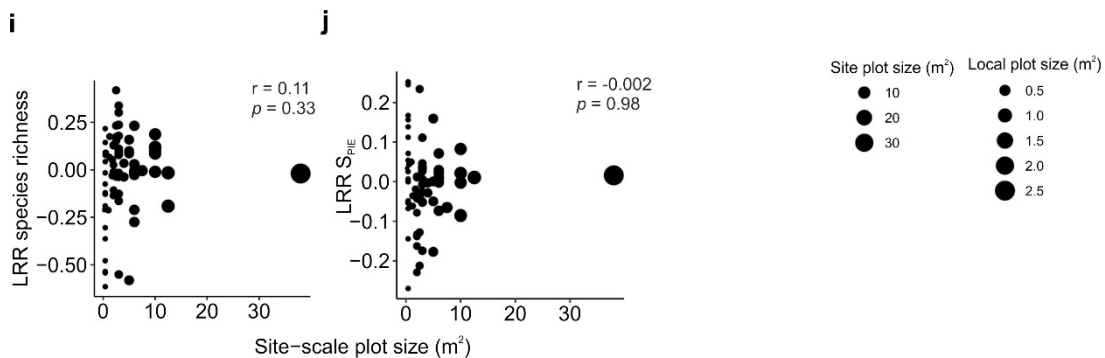

**Supplementary Figure 8:** Co-dependence between the mean and variance in the log response ratios of species richness (a-b, e-f, i) and effective number of species  $S_{PIE}$  (c-d, g-h, j) and plot size at the local (a-d), turnover (e-h) and site scale (i-j). Given are the correlation coefficient ( $r$ ) from Pearson's product moment correlation for paired samples and  $p$ -values are derived from an associated t-test (two-sided). No adjustments were made for multiple comparisons.



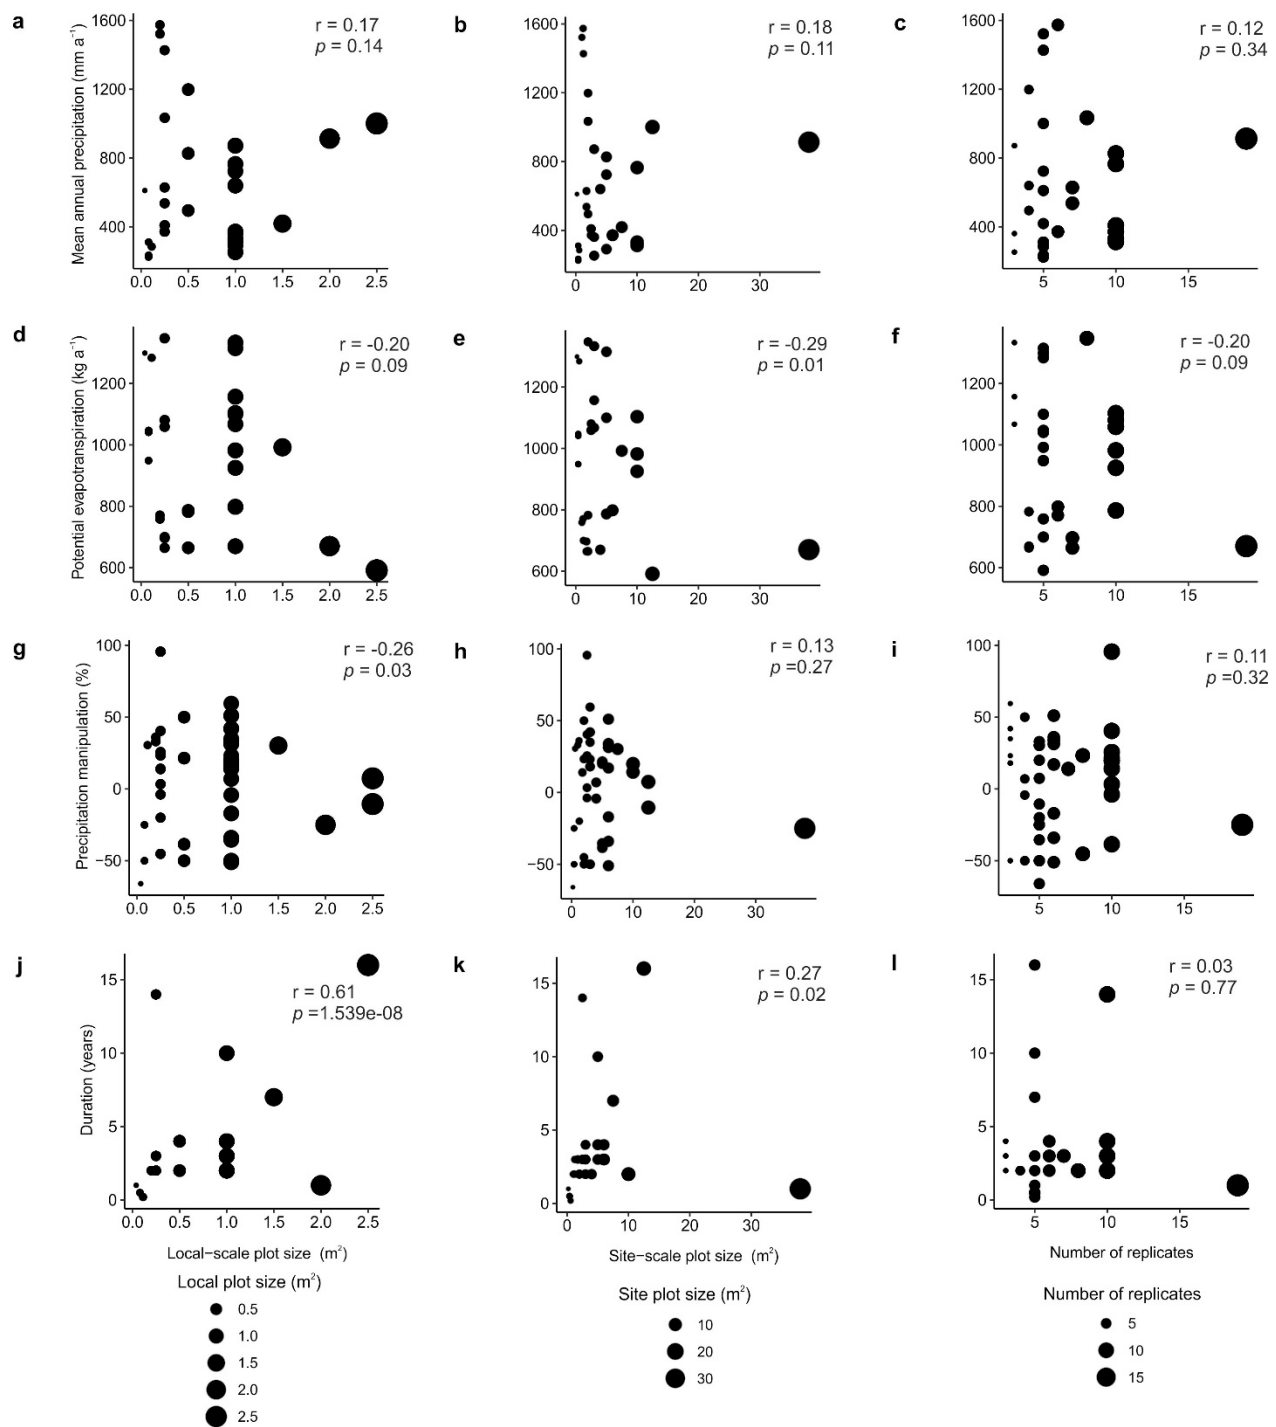

**Supplementary Figure 9:** Co-variation between plot size at the local-scale plot size (**a, d, g, j**), site-scale plot size (**b, e, h, k**) and number of replicates (**c, f, i, l**) and the moderators mean annual precipitation (**a-c**), potential evapotranspiration (**d-f**), magnitude of precipitation manipulation (**g-i**) and duration of the experiments (**j-l**). Given are the correlation coefficient ( $r$ ) from Pearson's product moment correlation for paired samples and  $p$ -values are derived from an associated t-test (two-sided). No adjustments were made for multiple comparisons.

## Supplementary References

- 1 Alon, M. & Sternberg, M. Effects of extreme drought on primary production, species composition and species diversity of a Mediterranean annual plant community. *Journal of Vegetation Science* 30, 1045-1061 (2019).
- 2 Báez, S., Collins, S. L., Pockman, W. T., Johnson, J. E. & Small, E. E. Effects of experimental rainfall manipulations on Chihuahuan Desert grassland and shrubland plant communities. *Oecologia* 172, 1117-1127 (2013).
- 3 Chimner, R., Welker, J., Morgan, J., LeCain, D. & Reeder, J. Experimental manipulations of winter snow and summer rain influence ecosystem carbon cycling in a mixed-grass prairie, Wyoming, USA. *Ecohydrology* 3, 284-293 (2010).
- 4 Collins, S. L. P., Wiliam; Fargione, Joe. Warming-El Nino-Nitrogen Deposition Experiment (WENNDEx): Net Primary Production Quadrat Data at the Sevilleta National Wildlife Refuge, New Mexico (2006 -present). doi:10.6073/pasta/564b856a2304244b48c2f744c1fbf619 (2011).
- 5 Eskelinen, A. & Harrison, S. P. Resource colimitation governs plant community responses to altered precipitation. *Proceedings of the National Academy of Sciences* 112, 13009-13014 (2015).
- 6 Fry, E. L. et al. Plant Functional Group Composition Modifies the Effects of Precipitation Change on Grassland Ecosystem Function. *Plos One* 8, e57027, doi:10.1371/journal.pone.0057027 (2013).
- 7 Gilgen, A. K. & Buchmann, N. Response of temperate grasslands at different altitudes to simulated summer drought differed but scaled with annual precipitation. *Biogeosciences* 6, 2525-2539, doi:10.5194/bg-6-2525-2009 (2009).
- 8 Grime, J. P. et al. Long-term resistance to simulated climate change in an infertile grassland. *Proceedings of the National Academy of Sciences* 105, 10028-10032, doi:10.1073/pnas.0711567105 (2008).
- 9 Hallett, L. M., Stein, C. & Suding, K. N. Functional diversity increases ecological stability in a grazed grassland. *Oecologia* 183, 831-840 (2017).
- 10 Harpole, W. S., Potts, D. L. & Suding, K. N. Ecosystem responses to water and nitrogen amendment in a California grassland. *Global Change Biology* 13, 2341-2348 (2007).
- 11 Holub, P., Fabšičová, M., Tůma, I., Záhora, J. & Fiala, K. Effects of artificially varying amounts of rainfall on two semi-natural grassland types. *Journal of Vegetation Science* 24, 518-529 (2013).
- 12 Kahmen, A., Perner, J. & Buchmann, N. Diversity-dependent productivity in semi-natural grasslands following climate perturbations. *Functional Ecology*, 594-601 (2005).
- 13 Lauenroth, W. SGS-LTER Effects of water and nitrogen additions on aboveground biomass in shortgrass ecosystems on the Central Plains Experimental Range, Nunn, Colorado, USA 1997-2011, ARS Study Number 143. doi:10.6073/pasta/55d7a673529b04d2bbd6fc7f6146703a (2014).
- 14 Ludewig, K. et al. Effects of reduced summer precipitation on productivity and forage quality of floodplain meadows at the Elbe and the Rhine River. *Plos One* 10, e0124140 (2015).
- 15 Mariotte, P., Vandenberghe, C., Kardol, P., Hagedorn, F. & Buttler, A. Subordinate plant species enhance community resistance against drought in semi-natural grasslands. *Journal of Ecology* 101, 763-773 (2013).

- 16 Miranda, J. d. D., Padilla, F., Lázaro, R. & Pugnaire, F. Do changes in rainfall patterns affect semiarid annual plant communities? *Journal of Vegetation Science* 20, 269-276 (2009).
- 17 Mueller, K. E. et al. Impacts of warming and elevated CO<sub>2</sub> on a semi-arid grassland are non-additive, shift with precipitation, and reverse over time. *Ecology Letters* 19, 956-966 (2016).
- 18 Prev y, J. S. & Seastedt, T. R. Seasonality of precipitation interacts with exotic species to alter composition and phenology of a semi-arid grassland. *Journal of Ecology* 102, 1549-1561, doi:10.1111/1365-2745.12320 (2014).
- 19 Serafini, J., Grogan, P. & Aarssen, L. Summer precipitation limits plant species richness but not overall productivity in a temperate mesic old-field meadow. *Journal of Vegetation Science* 30, 832-844, doi:https://doi.org/10.1111/jvs.12783 (2019).
- 20 Smith, M. D. K., Alan. The Climate Extremes Experiment (CEE): Assessing ecosystem resistance and resilience to repeated climate extremes at Konza Prairie. doi:10.6073/pasta/57bbbfcf22783a52ad09d7239073a5de (2018).
- 21 Wilcox, K. R., von Fischer, J. C., Muscha, J. M., Petersen, M. K. & Knapp, A. K. Contrasting above- and belowground sensitivity of three Great Plains grasslands to altered rainfall regimes. *Global Change Biology* 21, 335-344 (2015).
- 22 Yang, H. et al. Community structure and composition in response to climate change in a temperate steppe. *Global Change Biology* 17, 452-465 (2011).
- 23 Zhong, M. et al. Asymmetric responses of plant community structure and composition to precipitation variabilities in a semi-arid steppe. *Oecologia* 191, 697-708 (2019)
